# Supplementary material for: Upconversion luminescence and temperature sensing properties of Yb2(MoO4)3:Ln3+ (Ln = Ho, Tm, Er) phosphors based on energy transfer
Source: Royal Society of Chemistry journal article supplement (doi:10.1039/d3ce00497j), 2023-01-01
Supplement: d3ce00497j1.pdf [file d3ce00497j1.pdf]

## Supporting Information

### Upconversion luminescence and temperature sensing properties of $\text{Yb}_2(\text{MoO}_4)_3:\text{Ln}^{3+}$ ( $\text{Ln} = \text{Ho}, \text{Tm}, \text{Er}$ ) phosphors based on energy transfer

Huimin Du,<sup>a</sup> Yunhao Liang,<sup>a</sup> Xingzuo Liu,<sup>a</sup> Yue Deng,<sup>a</sup> Jie Yang,<sup>a</sup> Jun Yang<sup>\*a</sup> and Shanshan Hu<sup>\*a</sup>

*School of Chemistry and Chemical Engineering, Southwest University, No. 2 Tiansheng Road, Beibei District, Chongqing 400715, China.*

*E-mail: jyang@swu.edu.cn and hushan3@swu.edu.cn*

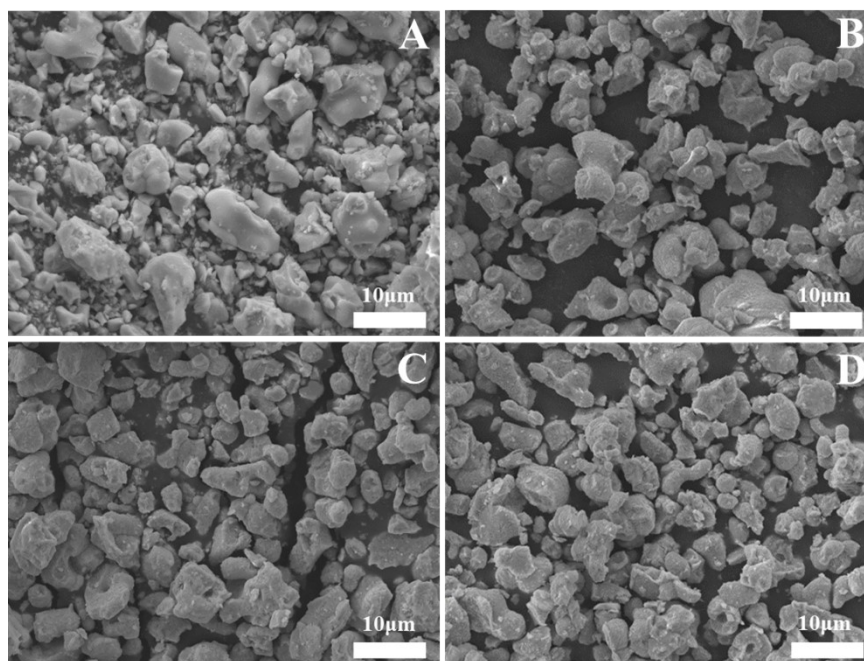

**Fig. S1** The SEM of (A) pure  $\text{Yb}_2(\text{MoO}_4)_3$  host; (B)  $\text{Yb}_2(\text{MoO}_4)_3:0.4\%\text{Ho}^{3+}$ ; (C)  $\text{Yb}_2(\text{MoO}_4)_3:0.2\%\text{Tm}^{3+}$ ; (D) SEM of  $\text{Yb}_2(\text{MoO}_4)_3:0.2\%\text{Er}^{3+}$ .

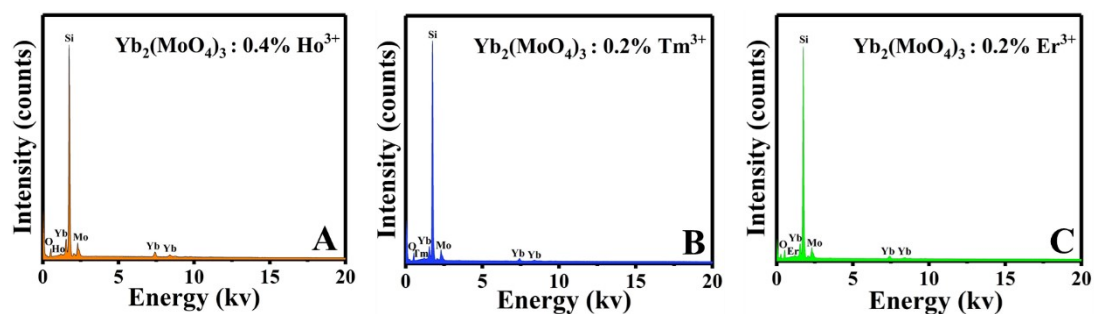

**Fig. S2** The EDS energy spectra of (A)  $\text{Yb}_2(\text{MoO}_4)_3:0.4\%\text{Ho}^{3+}$ ; (B)  $\text{Yb}_2(\text{MoO}_4)_3:0.2\%\text{Tm}^{3+}$ ;

(C)  $\text{Yb}_2(\text{MoO}_4)_3:0.2\%\text{Er}^{3+}$ .

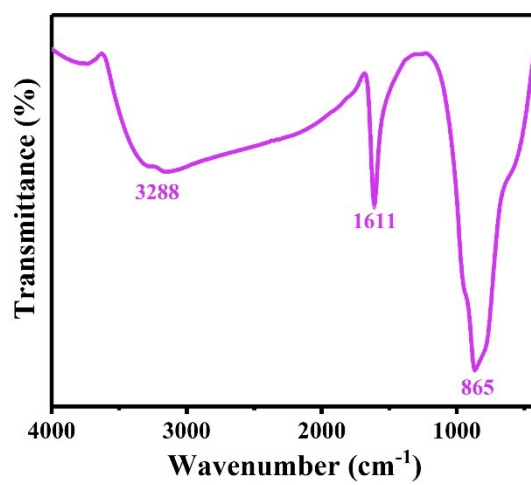

**Fig. S3** FT-IR spectrum of  $\text{Yb}_2(\text{MoO}_4)_3$  prepared under 200 °C hydrothermal treatment.
